# Supplementary material
Source: publisher site journal article supplement (https://www.dovepress.com/get_supplementary_file.php?f=417878.docx)
Supplement: Supplementary file 1 [file get_supplementary_file.php]

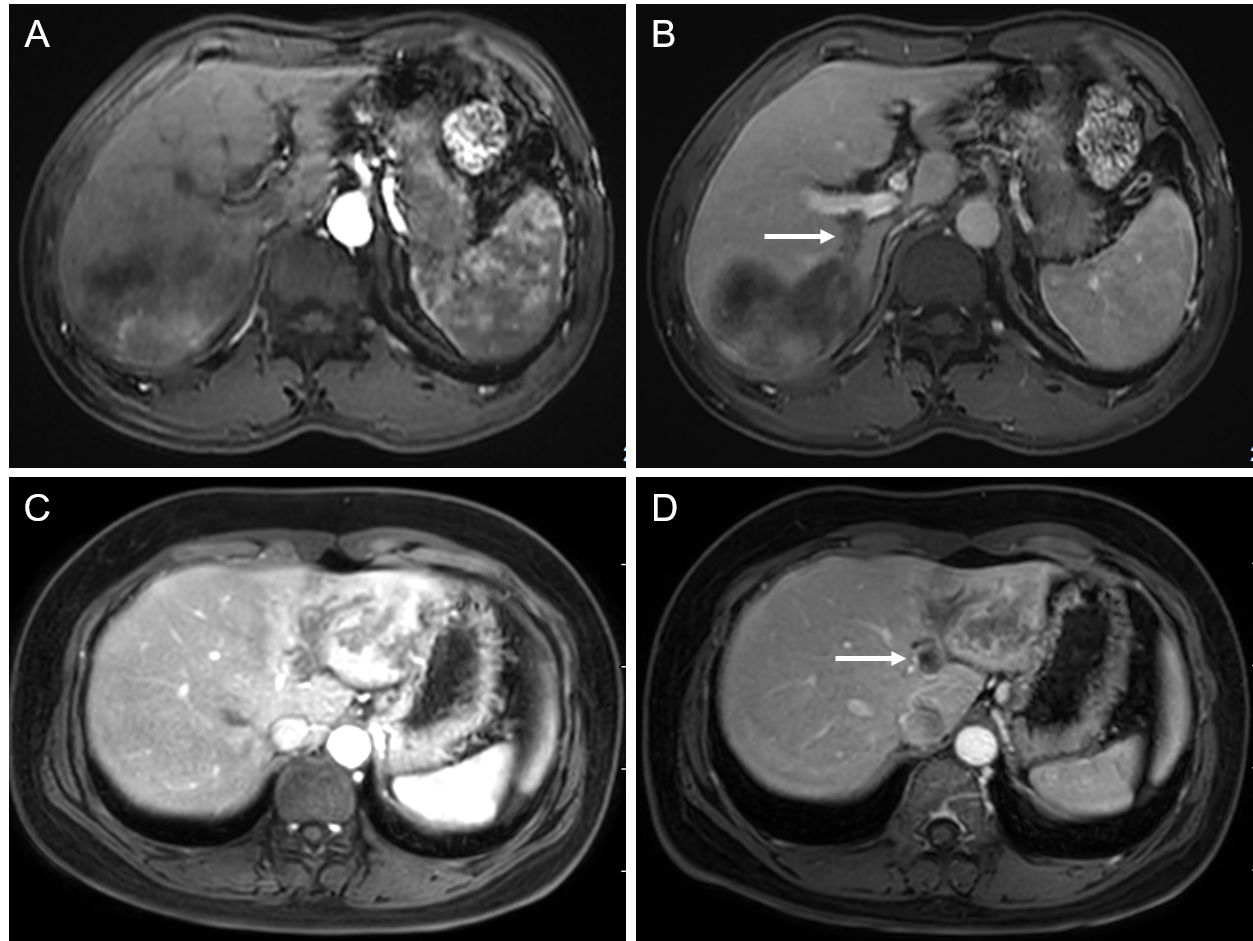


**Supplementary Figure 1** Typical imaging images of macrovascular invasion.


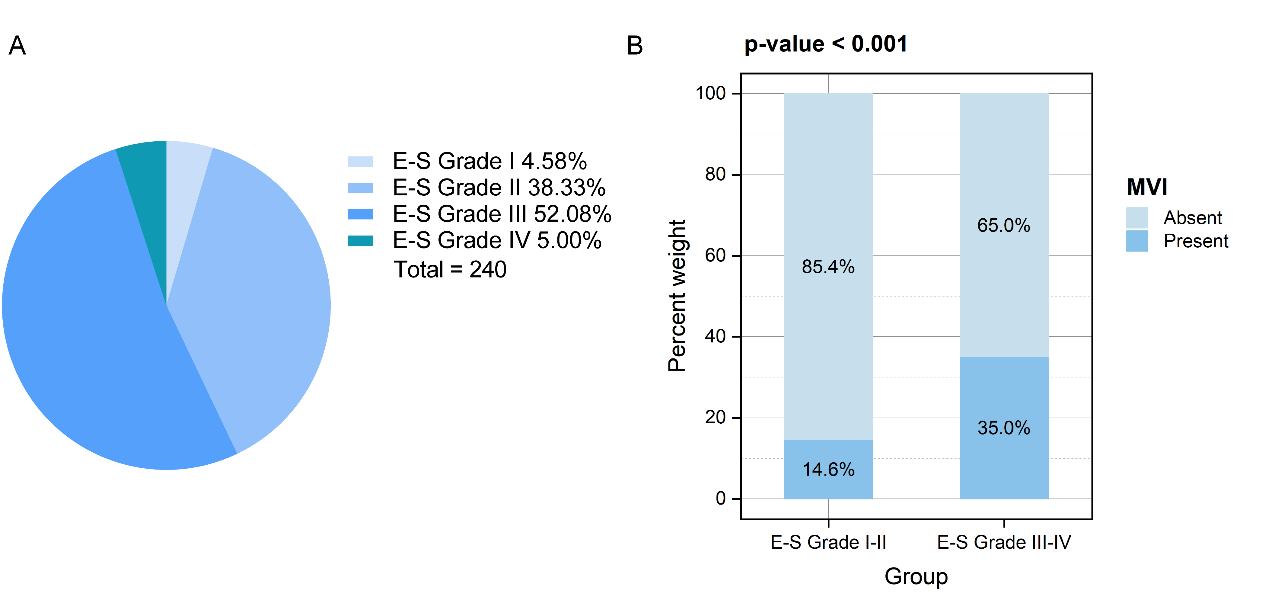


**Supplementary Figure 2** (**A**) Distribution of Edmondson-Steiner (E-S) grade of 240 hepatocellular carcinoma patients. (**B**) Probability of microvascular invasion (MVI) between the two groups.
